# Supplementary material
Source: PubMed Central journal article supplement (PMC2703547)
Supplement: en.2008-1706_2.pdf [file en.2008-1706_2.pdf]

**Supplemental table 1. Molecular mass (kDa) of human leptin pegylated with different PEG reagents**

| PEG reagent                  | Predicted value <sup>A</sup> | MALDI-TOF/<br>mass spectrometry | SDS-PAGE<br>(10%) | Gel filtration |
|------------------------------|------------------------------|---------------------------------|-------------------|----------------|
| mPEG2-NHS 40 kDa             | 56                           | 59.4                            | ~ 120             | ~ 400          |
| mPEG-SMB 30 kDa              | 46                           | 47.0                            | ~ 70              | ~ 310          |
| mPEG-SMB 20 kDa <sup>B</sup> | 56                           | 60.3                            | ~ 100             | ~ 400          |
| mPEG-SMB 20 kDa <sup>C</sup> | 36                           | 38.3                            | ~ 50              | ~ 220          |
| mPEG2-butyryl-ALD 40 kDa     | 56                           | 61.1                            | ~ 120             | ~ 400          |
| mPEG-butyryl-ALD 20 kDa      | 36                           | 38.5                            | ~ 50              | ~ 220          |

<sup>A</sup>Assuming the molecular mass of leptin to be ~16 kDa

<sup>B</sup>Di-pegylated species

<sup>C</sup>Mono-pegylated species
