# Supplementary material
Source: PubMed Central journal article supplement (PMC2703547)
Supplement: en.2008-1706_3.pdf [file en.2008-1706_3.pdf]

**Supplemental Table 2. Binding properties and biological activity in BAF/3 cells of pegylated human leptin and pegylated human leptin antagonist**

| PEG Reagent            | Human leptin         |                                    | Human leptin antagonist |                                    |
|------------------------|----------------------|------------------------------------|-------------------------|------------------------------------|
|                        | Binding <sup>A</sup> | Biological activity <sup>A,B</sup> | Binding <sup>A</sup>    | Biological activity <sup>A,B</sup> |
| mPEG2-NHS 40 kDa       | 7.5 (1) <sup>C</sup> | 4.9 ± 1.4 (5)                      | 6.8 ± 0.4 (3)           | 4.9 ± 1.4 (7)                      |
| mPEG-SMB 30 kDa        | 8.8 (1)              | 8.0 ± 1.5 (2)                      | 13.3 ± 0.4 (3)          | 12.7 ± 1.6 (8)                     |
| mPEG-SMB 20 kDa        | 6.8 (1)              | 3.0 ± 0.3 (2)                      | 8.1 ± 1.3 (3)           | 6.5 ± 0.9 (7)                      |
| mPEG2-butyr-ALD 40 kDa | 4.5 (1)              | 4.0 ± 0.6 (5)                      | 3.8 ± 0.2 (2)           | 2.9 ± 0.6 (3)                      |
| mPEG-butyr-ALD 20 kDa  | 16.8 (1)             | 19.5 ± 3.9 (5)                     | 15.9 ± 1.3 (2)          | 11.4 ± 1.8 (4)                     |

<sup>A</sup>As percent of the respective value of non-pegylated protein, given as mean or mean ± SEM, or as mean ± SD when the number of experiments was less than three

<sup>B</sup>The numbers for human leptin were calculated from the respective EC<sub>50</sub> values and the numbers for human leptin antagonists from the respective IC<sub>50</sub> values

<sup>C</sup>The numbers in parentheses indicate the number of independent experiments
