# Supplementary material
Source: PubMed Central journal article supplement (PMC2703547)
Supplement: en.2008-1706_4.pdf [file en.2008-1706_4.pdf]

**Supplemental Table 3. Acid precipitation of <sup>131</sup>I-PEG-MLA in blood and brain**

| Time (min)        | Brain (%) <sup>A</sup> | Serum (%) <sup>A</sup> |
|-------------------|------------------------|------------------------|
| 5                 | 113.7 ± 5.2            | 108.5 ± 0.2            |
| 20                | 81.8 ± 7.8             | 109.0 ± 0.4            |
| 60                | 81.1 ± 9.9             | 107.6 ± 0.3            |
| 480 <sup>B</sup>  | 106.3 ± 14.7           | 111.8 ± 1.6            |
| 1080 <sup>B</sup> | 66.9 ± 8.0             | 104.5 ± 7.8            |
| 1440 <sup>B</sup> | 59.7 ± 7.5             | 85.8 ± 7.0             |

<sup>A</sup>Percent TCA-precipitated radiolabeled PEG-MLA out of total, 3-4 mice per time point, mean ± SEM

<sup>B</sup>Mice received vascular washout
