# Supplementary material
Source: PubMed Central journal article supplement (PMC2703547)

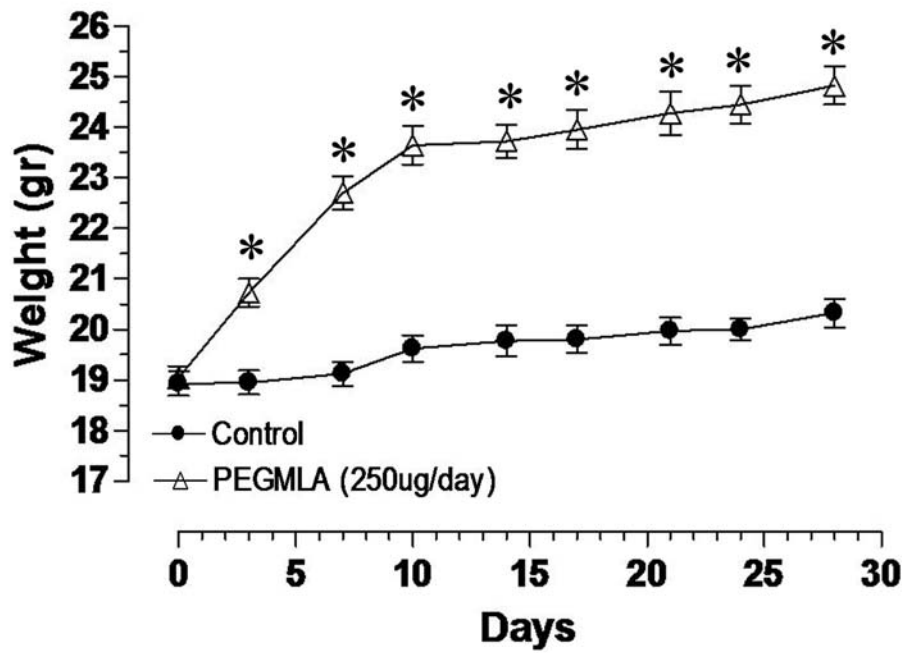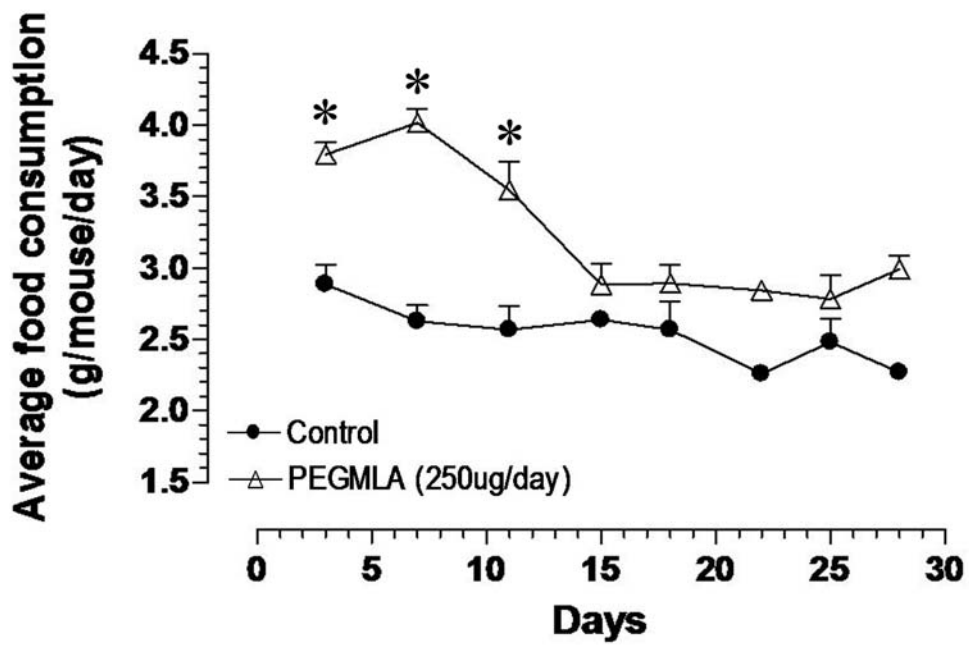

Supplement: en.2008-1706_1.pdf [file en.2008-1706_1.pdf]
